# Supplementary material for: Dipole–multipole plasmonic coupling between gold nanorods and titanium nitride nanoparticles for enhanced photothermal conversion
Source: Royal Society of Chemistry journal article supplement (doi:10.1039/d3cp05933b), 2024-01-01
Supplement: d3cp05933b1.pdf [file d3cp05933b1.pdf]

## Electronic Supplementary Information (ESI)

# Dipole-multipole Plasmonic Coupling between Gold Nanorods and Titanium Nitride Nanoparticles for Enhanced Photothermal Conversion

Min Xi<sup>a,||\*</sup>, Chenyang Xu<sup>b,||</sup>, Li Zhong<sup>b\*</sup>, Cui Liu<sup>a</sup>, Nian Li<sup>a</sup>, Shudong Zhang<sup>a\*</sup>, Zhenyang Wang<sup>a</sup>

<sup>a</sup> Institute of Solid State Physics and Key Laboratory of Photovoltaic and Energy Conservation Materials, Hefei Institutes of Physical Science, Chinese Academy of Sciences, Hefei, Anhui, 230031, P. R. China

<sup>b</sup> School of Mechatronics & Vehicle Engineering, Chongqing Jiaotong University, Chongqing, 400074, P. R. China

<sup>||</sup> These authors contributed equally to this work.

Corresponding authors:

Min Xi – [orcid.org/0000-0003-4414-3110](https://orcid.org/0000-0003-4414-3110); Email: [minxi@issp.ac.cn](mailto:minxi@issp.ac.cn)

Li Zhong – Email: [xihan@cqjtu.edu.cn](mailto:xihan@cqjtu.edu.cn)

Shudong Zhang – Email: [sdzhang@iim.ac.cn](mailto:sdzhang@iim.ac.cn)

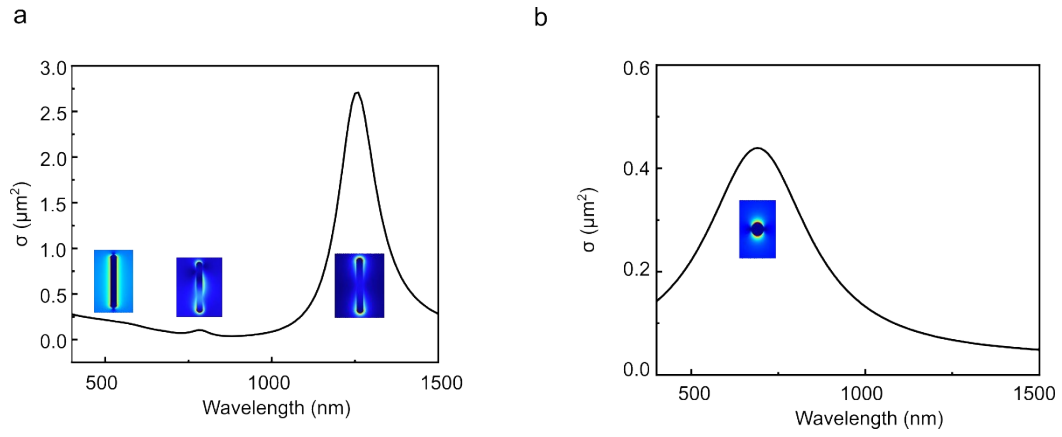

**Fig. S1** Calculated far-field spectrum of Au NR **(a)** and TiN NP **(b)**, and inset showed normalized E-field distribution at each mode.

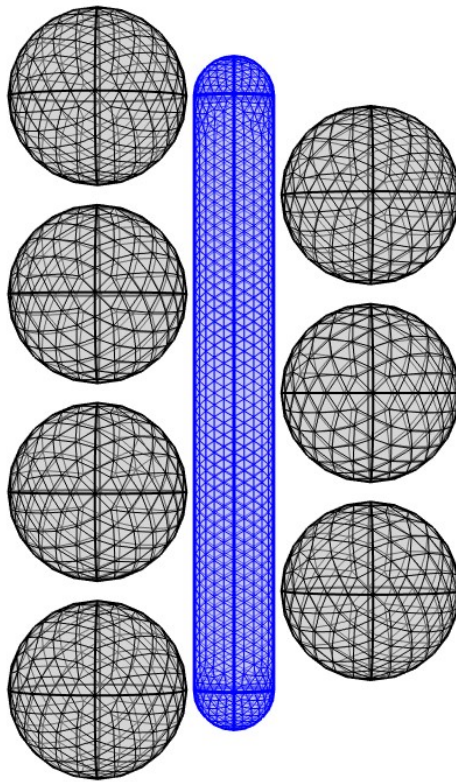

**Fig. S2** Representative mesh plot of Au NR/TiN NP nanocluster.

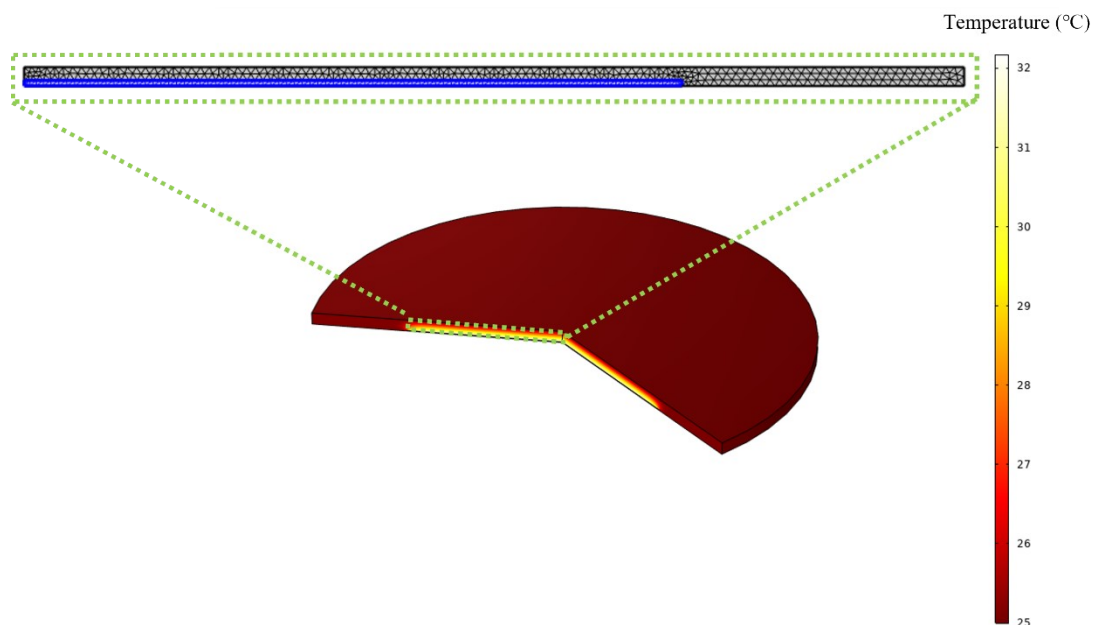

**Fig. S3** Modeling of Au NR/TiN NP/PVDF nanofilm.

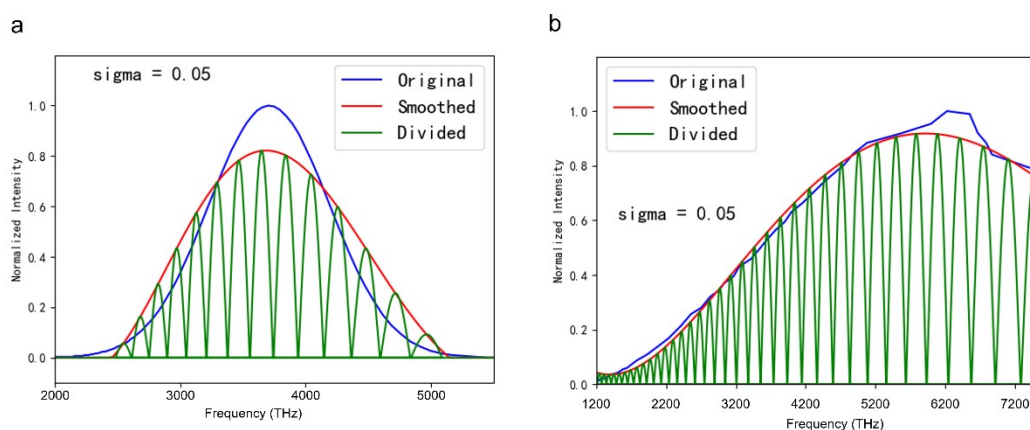

**Fig. S4** Processed elemental Gaussian beam series with different beam diameter to approximately describe 808 nm monochromatic laser beam **(a)** and solar spectrum **(b)**, respectively. Blue curve indicates the normalized 808 nm monochromatic laser beam and original solar spectrum, red curve indicates the polynomial smoothed curve, and the green curve indicates the processed elemental Gaussian beam series with  $\sigma = 0.05$ .

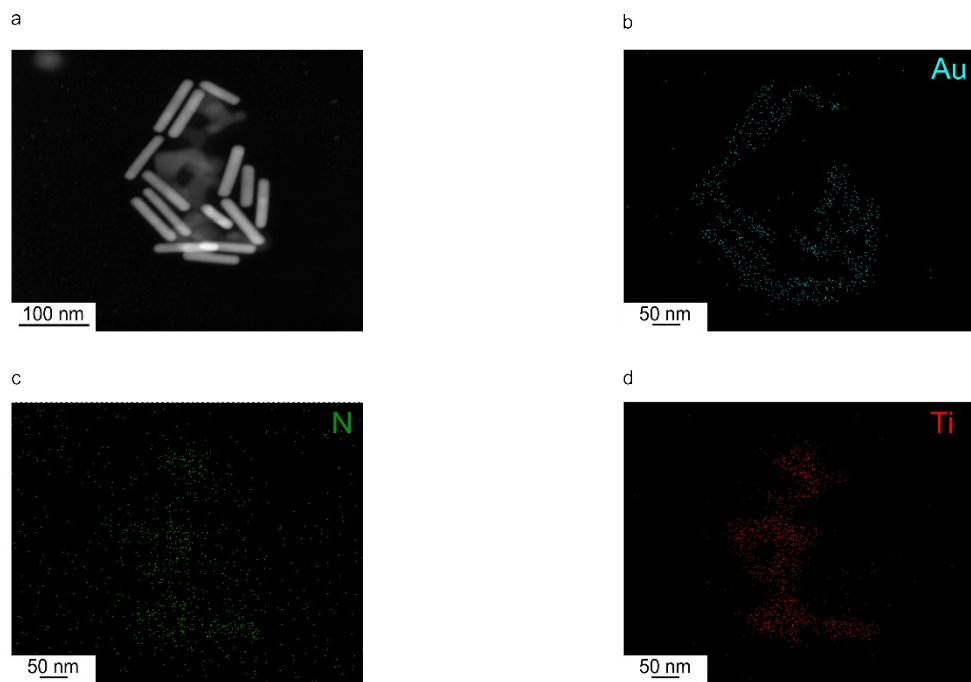

**Fig. S5 (a)** Representative TEM image of Au NR/TiN NP nanocluster; **(b) – (d)** Elemental mapping of Au NR/TiN NP nanocluster in **Fig. S5a**.
